# Supplementary material for: Overexpression of the Transcription Factors GmSHN1 and GmSHN9 Differentially Regulates Wax and Cutin Biosynthesis, Alters Cuticle Properties, and Changes Leaf Phenotypes in Arabidopsis
Source: PubMed Central journal article supplement (PMC4849042; doi:10.3390/ijms17040587), 2016-04-21
Supplement: ijms-17-00587-s001.pdf [file ijms-17-00587-s001.pdf]

# Supplementary Material: Overexpression of the Transcription Factors GmSHN1 and GmSHN9 Differentially Regulates Wax and Cutin Biosynthesis, Alters Cuticle Properties, and Changes Leaf Phenotypes in Arabidopsis

Yangyang Xu, Hanying Wu, Mingming Zhao, Wang Wu, Yinong Xu and Dan Gu

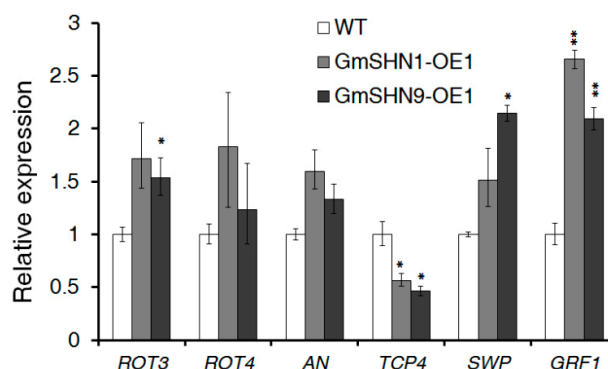

**Figure S1.** Expression of leaf development related genes in six-week-old transgenic and WT Arabidopsis. Expression levels of each gene in WT were taken as 1. The Arabidopsis *ACT2* gene was used as the internal control for normalization of the template cDNAs. The results are given as mean values of three replicates and error bars represent SD ( $n = 3$ ). \*  $p < 0.05$ , \*\*  $p < 0.01$  vs. WT with two tailed Student's *t* test.

**Table S1.** Composition of cuticular wax on leaves of wild type, GmSHN1-OE1, and GmSHN9-OE1 transgenic plants.

| Compound Class | Wild Type ( $\mu\text{g}/\text{cm}^2$ ) | GmSHN1-OE1 ( $\mu\text{g}/\text{cm}^2$ ) | GmSHN9-OE1 ( $\mu\text{g}/\text{cm}^2$ ) |
|----------------|-----------------------------------------|------------------------------------------|------------------------------------------|
| Fatty acids    | $0.126 \pm 0.014$                       | $1.213 \pm 0.225$                        | $1.274 \pm 0.124$                        |
| Aldehydes      | $0.030 \pm 0.006$                       | $0.212 \pm 0.012$                        | $0.259 \pm 0.059$                        |
| Primary        | $0.182 \pm 0.020$                       | $1.266 \pm 0.268$                        | $2.278 \pm 0.324$                        |
| Alkanes        | $0.864 \pm 0.198$                       | $7.74 \pm 1.743$                         | $10.233 \pm 1.892$                       |
| Total          | $1.202 \pm 0.201$                       | $10.436 \pm 1.759$                       | $14.044 \pm 2.020$                       |

The coverage of total wax and individual compound classes are given as mean values with  $\pm$ SD ( $n = 4$ ). Significance was assessed by Student's *t* test (\*  $p < 0.05$ , \*\*  $p < 0.01$ , \*\*\*  $p < 0.001$ ).

**Table S2.** Sequences of the primers used for transgenic Arabidopsis construction and identification of GmSHNs and cuticle related gene expression assays.

| Gene Name                                                | Sense Primer (5'-3')      | Sense Primer (5'-3')       |
|----------------------------------------------------------|---------------------------|----------------------------|
| Primers used for semi-quantitative RT-PCR amplifications |                           |                            |
| GmSHN1                                                   | AGAGCAAGATAGTTCTGGCCA     | AGCTCGGGATGATGGGGCTAATTC   |
| GmSHN2                                                   | AGACAACATAGTTCTGACCAAC    | CTCAATTCCTATTGAGAAGTTCC    |
| GmSHN3                                                   | AGAACCCCAACAACTCTTAAC     | TCCATAACACTCTGTGGAAAAG     |
| GmSHN4                                                   | AGACAAACTCTAACAACATCATGG  | CTCGTGAATACCATAACGCTGTGT   |
| GmSHN5                                                   | AGATAGTTACTGCTCTAACCAAC   | CTCGTGAAAGCGAAAATTGCGTTG   |
| GmSHN6                                                   | GACCCCGAGAATTCCCACAT      | AGAAGCTCCTGTCTCACCCTTG     |
| GmSHN7                                                   | AGATCATGGTGCAAACAAGGAAG   | CTCCTTCTTCAGGAAACATTTC     |
| GmSHN8                                                   | CATTTTGTAACAATAATACAATTAT | TACTAAACCGTTCAAAGACGTTTTTC |
| GmSHN9                                                   | AGAAACACCCACCGCACAAAGCC   | AGCTCAGTATTAGCCATGACACCAA  |
| GmSHN10                                                  | AGATTTCTCACGCGCCATTAAC    | CTCTGATGCTTAATTACCACCAA    |

**Table S2.** Cont.

| Gene Name                                                                    | Sense Primer (5'-3')          | Sense Primer (5'-3')          |
|------------------------------------------------------------------------------|-------------------------------|-------------------------------|
| Primers for construction and identification of transgenic Arabidopsis plants |                               |                               |
| GmSHN1                                                                       | TCATCTAGAGCAAGATAGTTCTGGCCA   | GAGAGCTCGGGATGATGGGGCTAATTC   |
| GmSHN3                                                                       | TCATCTAGAACCCCAACAACTCTTAAC   | TCAGGATCCATAACACTCTGTGGAAAAG  |
| GmSHN5                                                                       | TCATCTAGATAGTTACTGCTCTAACCAAC | TCAGAGCTCGTGAAAGCGAAATTGCGTTG |
| GmSHN7                                                                       | TCATCTAGATCATGGTGCAAACAAGGAAG | TCAGAGCTCCTTCTCAGGAAACATTTC   |
| GmSHN8                                                                       | TCACATTTTGTAACAATAATACAATTAT  | CGTFACTAAACCGTTCAAAGACGTTTC   |
| GmSHN9                                                                       | TCATCTAGAAACACCCACCGCACAAAGCC | CAGAGCTCAGTATTAGCCATGACACCAA  |
| Primers for subcellular localizations                                        |                               |                               |
| GmSHN1                                                                       | TGAGTCGACATGGTGCAATCAAGGAAA   | GACCATGGAATTCCTATTGAGAAGTTC   |
| GmSHN9                                                                       | TGAGTCGACATGGTACAAGCAAAGAAG   | GACCATGGATTAATTACTCGAACCACA   |
| Gene Name                                                                    | Sense Primer (5'-3')          | Sense Primer (5'-3')          |
| Primers used for quantitative RT-PCR amplifications                          |                               |                               |
| AtCER1                                                                       | GCTTAACAGGAACGGAGAGG          | ATCACGACGCTTGATGTTGC          |
| AtCER2                                                                       | AACGACAACGACACTTCAGC          | GAGCCACTTCTCCACTGTGA          |
| AtCER3                                                                       | TTGGATGTTGCTGTTTGGT           | CCCATTCTTGATGATGCAG           |
| AtCER4                                                                       | TTCCCTCTGTGATCTTGATGCTGTT     | TTGGTCCACGGTTTGATTGA          |
| AtCER5                                                                       | CGGTCTCGTCGCTTATGTAACA        | TGCGGTGCGTTAAGATCTC           |
| AtCER6                                                                       | AAATCTTCAACCCGAAATGG          | GATCGCCTCTCCTCATTTCTC         |
| AtCER7                                                                       | CAAAGGCGGTCCCTCAAAT           | CCATCCTTGTTTTGTATCCTTCT       |
| AtCER10                                                                      | CTCATCTGGGCTTCTCTCGTTT        | TCCAGGAGTCACGGGAAGAG          |
| AtKCS1                                                                       | CGGATTCTCCTCTCTAACCG          | GGAAGAACCATCGGTCCTAA          |
| AtKCS2                                                                       | AACAGCTTCTTCAGGTCAACCA        | ACGGACGGTGTGGATGAGTT          |
| AtFDH                                                                        | TGTTCTGCCGTTATGCTCTC          | GAGCTTACCTCCAACCTCC           |
| AtKCR1                                                                       | ATCACCAGAGGGTTACGCAAA         | CTGGAGGCATCTCTTGATGTTAAAT     |
| AtPAS2                                                                       | CCGATCTCTCCGCATAAAA           | CATCCAGCAAAGACGATCCA          |
| AtMAH1                                                                       | TGGCGATGCTAGGTTTTTACG         | GAGGGATTGGTGGAGCATTTC         |
| AtLTPG                                                                       | TGGCACCAGCAGGAAAAGTC          | AGGAGACGGCCATCAAAGC           |
| AtLACS1                                                                      | AAAGGTTTTCTCCGATTGATTC        | CCACTCGACTCCCAGGTTCA          |
| AtLACS2                                                                      | CACGAGCGATGTGTTCTTCT          | GTTTCTTGCGTATCAAGCCA          |
| AtLACS3                                                                      | AGAAGCGATGTTTGCACCATAA        | TCCTCAATCACACGATCGAAGA        |
| AtGPAT4                                                                      | AACGGGACGACAGTTAGAGG          | AAACTCCACCGATCACCTTC          |
| AtGPAT6                                                                      | CCTTCTCCGGTTTAGTGCTC          | TTGCTCCTTTACACGTCAG           |
| AtCYP86A4                                                                    | GCTTGGGCTCGGTTTAGAAGT         | CATGAAACGCGAGAGGAGATC         |
| AtCYP86A7                                                                    | CGTCTCGTGCCGATTCTTG           | GCGAATCCGTTCTCAGGAAA          |
| AtCS1                                                                        | TCGAAGGTGCATGGACATCA          | GGGTCGTCCAATAGTGCTTTG         |
| AtLNG1                                                                       | CTCGTGGCCTACAGCAATCTG         | CAGCGACCTCATTCCCAAGT          |
| AtLNG2                                                                       | GAACCCGCAACAATGACTCA          | AAGCAGGTATCCTCTTGATCGAA       |
| AtROT3                                                                       | CGGCTGTTACCTTCATGGA           | ATCTGAGGAACGCGCCAAT           |
| AtROT4                                                                       | CTCTTCAATTTCTTGCACTTTTTTA     | TTTGCGGTGCTGGTTCTG            |
| AtAN                                                                         | CGGTGCTGAAGGTCCACAAT          | CCTGTTGCCTACTGGTGGATTC        |
| AtAN3                                                                        | GGAGGAGAGAAAGCGAGATAACAC      | GACAACCCCAACCACAAAAC          |
| AtTCP4                                                                       | GCACGACGGTCTCACTCACAA         | GATTCAGGCCATTGACTACACAAA      |
| AtSWP                                                                        | AGCGCCTGCCAAAGTGTCTA          | TGGATAGGTGCCCTCGGTAA          |
